# Supplementary material
Source: MDPI journal article supplement (https://www.mdpi.com/2071-1050/9/5/851)
Supplement: s1 [file s1]

**Table S1.** Climate models used to simulate ensemble climate scenarios.

| <b>Climate Models</b> | <b>Affiliation</b>                                                                                                                                                        |
|-----------------------|---------------------------------------------------------------------------------------------------------------------------------------------------------------------------|
| ACCESS1.0             | Commonwealth Scientific and Industrial Research Organization /Bureau of Meteorology (CSIRO-BOM)                                                                           |
| BCC-CSM1-1            | Beijing Climate Center, China Meteorological Administration                                                                                                               |
| BNU-ESM               | College of Global Change and Earth System Science, Beijing Normal University                                                                                              |
| CANESM2               | Canadian Centre for Climate Modelling and Analysis                                                                                                                        |
| CCSM4                 | NCAR Climate Community System Model                                                                                                                                       |
| CESM1-CAM5            | NCAR Community Earth System Model                                                                                                                                         |
| CMCC-CM               | Centro Euro-Mediterraneo per I Cambiamenti Climatici                                                                                                                      |
| CNRM-CM5              | Centre National de Recherches Meteorologiques / Centre Europeen de Recherche et Formation Avancees en Calcul Scientifique (CNRM/CERFACS)                                  |
| CSIRO-MK360           | Commonwealth Scientific and Industrial Research Organization/ Queensland Climate Change Centre of Excellence (CSIRO-QCCCE)                                                |
| EC-EARTH              | European Centre for Medium-Range Weather Forecasts (ECMRWF )                                                                                                              |
| FGOALS-G2             | Institute of Atmospheric Physics, Chinese Academy of Sciences                                                                                                             |
| FIO-ESM               | First Institute of Oceanography, SOA, China                                                                                                                               |
| GFDL-CM3              | Geophysical Fluid Dynamics Laboratory, NOAA                                                                                                                               |
| GFDL-ESM2G            | Geophysical Fluid Dynamics Laboratory, NOAA                                                                                                                               |
| GISS-E2-H             | NASA Goddard Institute for Space Studies                                                                                                                                  |
| GISS-E2-R             | NASA Goddard Institute for Space Studies                                                                                                                                  |
| HADGEM2-ES            | Met Office Hadley Centre,                                                                                                                                                 |
| INM-CM4               | Institute for Numerical Mathematics                                                                                                                                       |
| IPSL-CM5A-MR          | Institute Pierre-Simon Laplace                                                                                                                                            |
| MIROC5                | Atmosphere and Ocean Research Institute (The University of Tokyo), National Institute for Environmental Studies, and Japan Agency for Marine-Earth Science and Technology |
| MIROC-ESM             | Atmosphere and Ocean Research Institute (The University of Tokyo), National Institute for Environmental Studies, and Japan Agency for Marine-Earth Science and Technology |
| MIROC-ESM-CHEM        | Atmosphere and Ocean Research Institute (The University of Tokyo), National Institute for Environmental Studies, and Japan Agency for Marine-Earth Science and Technology |
| MPI-ESM-LR            | Max Planck Institute for Meteorology (MPI-M)                                                                                                                              |
| MPI-ESM-MR            | Max Planck Institute for Meteorology (MPI-M)                                                                                                                              |
| MRI-CGCM3             | Meteorological Research Institute                                                                                                                                         |
| NORES1-M              | Norwegian Climate Centre (NCC)                                                                                                                                            |
